# Supplementary material for: Neuronal complexity is attenuated in preclinical models of migraine and restored by HDAC6 inhibition
Source: eLife. 2021 Apr 15;10:e63076. doi: 10.7554/eLife.63076 (PMC8147088; doi:10.7554/eLife.63076)
Supplement: Figure 1—figure supplement 1—source data 1. [file elife-63076-fig1-figsupp1-data1.xlsx]

## Sheet: Figure 1-Figure Supplement 1B
Vehicle	NTG
21	9
14	9
15	9
15	15
19	14
12	9
16	16
24	16
29	20
22	14
18	15
21	15
24	15
23	17
24	15
25	24
19	17
21	13
19	16
22	13
23	16
18	13
21	12
20	15
22	18
23	21
24	11
17	15
17	18
21	16
23	15
26	18
22	16
19	22
22	16
24	17
