# Supplementary material for: Neuronal complexity is attenuated in preclinical models of migraine and restored by HDAC6 inhibition
Source: eLife. 2021 Apr 15;10:e63076. doi: 10.7554/eLife.63076 (PMC8147088; doi:10.7554/eLife.63076)
Supplement: Figure 1—figure supplement 1—source data 2. [file elife-63076-fig1-figsupp1-data2.xlsx]

## Sheet: Figure 1-Figure Supplement 1C
Vehicle	NTG
846.324	340.784
541.577	378.842
474.834	300.248
497.571	626.159
450.959	575.72
432.087	286.622
578.279	508.954
751.569	434.333
1060.69	626.656
731.046	478.077
625.058	503.788
490.989	417.353
794.256	561.766
814.503	429.077
787.932	455.055
658.354	866.061
725.54	356.312
539.379	417.809
511.528	295.369
559.521	215.098
834.028	324.162
449.709	230.549
511.762	260.488
600.696	232.464
509.777	558.287
684.331	678.157
519.107	354.821
447.899	500.233
440.167	535.831
507.721	288.456
708.565	487.061
529.352	536.834
523.031	642.18
516.6	590.553
630.54	583.113
797.942	583.562
