# Supplementary material for: Neuronal complexity is attenuated in preclinical models of migraine and restored by HDAC6 inhibition
Source: eLife. 2021 Apr 15;10:e63076. doi: 10.7554/eLife.63076 (PMC8147088; doi:10.7554/eLife.63076)
Supplement: Figure 1—figure supplement 1—source data 3. [file elife-63076-fig1-figsupp1-data3.xlsx]

## Sheet: Figure 1-Supplement 1D
Vehicle	NTG
89	41
61	45
55	33
45	67
53	59
51	32
64	50
73	46
114	68
78	42
68	54
56	42
49	36
54	23
88	37
41	24
53	31
67	25
51	55
77	49
53	46
43	98
42	37
55	50
71	61
52	67
54	35
57	52
61	57
90	29
79	44
85	56
77	74
66	60
81	54
54	62
