# Supplementary material for: Neuronal complexity is attenuated in preclinical models of migraine and restored by HDAC6 inhibition
Source: eLife. 2021 Apr 15;10:e63076. doi: 10.7554/eLife.63076 (PMC8147088; doi:10.7554/eLife.63076)
Supplement: Figure 1—figure supplement 1—source data 4. [file elife-63076-fig1-figsupp1-data4.xlsx]

## Sheet: Figure 1-Figure Supplement 1F
Vehicle	NTG
16	14
10	7
12	16
12	7
20	10
8	9
14	13
8	7
12	8
11	6
13	7
12	5
12	11
13	8
15	7
22	11
14	9
18	11
17	7
9	10
11	9
11	9
10	11
12	7
15	11
15	10
22	10
13	17
19	8
11	15
14	10
15	11
15	12
17	19
14	16
11	13
