# Supplementary material for: Neuronal complexity is attenuated in preclinical models of migraine and restored by HDAC6 inhibition
Source: eLife. 2021 Apr 15;10:e63076. doi: 10.7554/eLife.63076 (PMC8147088; doi:10.7554/eLife.63076)
Supplement: Figure 1—figure supplement 1—source data 5. [file elife-63076-fig1-figsupp1-data5.xlsx]

## Sheet: Figure 1-Figure Supplement 1G
Vehicle	NTG
637.729	633.131
411.111	324.048
646.277	690.556
714.318	272.779
1110.36	309.494
467.112	196.416
326.132	661.285
379.7	260.208
340.652	279.888
379.818	175.525
463.506	291.279
439.852	134.81
329.771	531.486
343.827	413.906
586.419	206.596
1010.78	403.431
813.386	246.095
810.95	372.014
499.667	298.468
336.424	702.008
283.919	388.444
500.148	445.3
489.516	276.698
444.178	333.688
522.416	516.509
641.06	391.108
653.725	440.81
519.675	616.296
583.774	339.807
364.656	466.538
747.475	357.179
367.289	417.938
578.066	898.606
565.501	665.918
596.249	680.896
367.094	403.618
