# Supplementary material for: Neuronal complexity is attenuated in preclinical models of migraine and restored by HDAC6 inhibition
Source: eLife. 2021 Apr 15;10:e63076. doi: 10.7554/eLife.63076 (PMC8147088; doi:10.7554/eLife.63076)
Supplement: Figure 1—figure supplement 1—source data 6. [file elife-63076-fig1-figsupp1-data6.xlsx]

## Sheet: Figure 1-Figure Supplement 1H
Vehicle	NTG
69	66
50	35
73	70
75	32
120	35
52	23
34	71
43	29
35	31
41	20
51	33
44	15
35	61
38	48
61	21
111	41
90	23
89	40
47	32
35	82
29	41
55	50
53	29
48	37
80	55
38	40
58	46
56	60
58	38
40	47
54	40
67	42
66	98
53	65
61	68
44	44
