# Supplementary material for: Neuronal complexity is attenuated in preclinical models of migraine and restored by HDAC6 inhibition
Source: eLife. 2021 Apr 15;10:e63076. doi: 10.7554/eLife.63076 (PMC8147088; doi:10.7554/eLife.63076)
Supplement: Figure 1—figure supplement 1—source data 7. [file elife-63076-fig1-figsupp1-data7.xlsx]

## Sheet: Figure 1-Figure Supplement 1J
Vehicle	NTG
20	16
10	15
18	23
14	19
11	16
14	15
21	21
12	17
23	19
19	13
12	21
26	19
21	15
21	11
14	22
11	19
18	18
13	22
32	23
11	23
9	22
13	26
17	19
22	11
20	8
16	11
25	25
11	17
14	13
40	16
	19
	13
	12
	16
	8
	21
