# Supplementary material for: Neuronal complexity is attenuated in preclinical models of migraine and restored by HDAC6 inhibition
Source: eLife. 2021 Apr 15;10:e63076. doi: 10.7554/eLife.63076 (PMC8147088; doi:10.7554/eLife.63076)
Supplement: Figure 1—figure supplement 1—source data 8. [file elife-63076-fig1-figsupp1-data8.xlsx]

## Sheet: Figure 1-Figure Supplement 1K
Vehicle	NTG
607.739	383.664
409.68	428.55
535.417	683.786
521.408	622.26
303.057	496.734
399.769	488.407
410.58	663.86
236.973	459.17
571.224	611.217
608.691	287.947
294.622	584.841
699.02	473.95
905.173	463.581
562.696	398.594
317.572	612.511
251.226	644.945
523.057	472.505
470.818	611.555
705.558	546.733
203.055	761.382
243.786	1030.59
360.036	966.426
721.929	658.601
621.627	265.289
616.564	297.972
364.898	469.694
797.34	763.656
257.409	449.303
331.475	393.729
1612.63	551.288
	434.06
	359.229
	311.54
	559.205
	143.527
	345.95
