# Supplementary material for: Neuronal complexity is attenuated in preclinical models of migraine and restored by HDAC6 inhibition
Source: eLife. 2021 Apr 15;10:e63076. doi: 10.7554/eLife.63076 (PMC8147088; doi:10.7554/eLife.63076)
Supplement: Figure 1—figure supplement 1—source data 9. [file elife-63076-fig1-figsupp1-data9.xlsx]

## Sheet: Figure 1-Figure Supplement 1L
Vehicle	NTG
64	43
50	42
59	67
55	69
31	54
41	45
43	68
25	53
55	64
65	30
29	47
76	46
94	50
57	46
34	60
29	72
51	50
49	55
71	59
21	82
22	109
38	100
80	73
62	30
62	35
37	54
82	74
25	45
31	43
159	56
	46
	40
	33
	53
	14
	33
