# Supplementary material for: Neuronal complexity is attenuated in preclinical models of migraine and restored by HDAC6 inhibition
Source: eLife. 2021 Apr 15;10:e63076. doi: 10.7554/eLife.63076 (PMC8147088; doi:10.7554/eLife.63076)
Supplement: Figure 1—figure supplement 1—source data 10. [file elife-63076-fig1-figsupp1-data10.xlsx]

## Sheet: Figure 1-Figure Supplement 1N
Veh	NTG
14	18
9	12
12	8
9	9
7	7
10	9
12	14
10	11
12	17
11	10
18	10
13	9
11	11
10	8
12	13
7	10
8	10
9	8
12	13
12	9
10	16
12	14
14	14
7	9
9	10
13	11
13	16
13	8
8	11
9	12
9	10
15	15
11	16
8	13
8	10
9	10
