# Supplementary material for: Neuronal complexity is attenuated in preclinical models of migraine and restored by HDAC6 inhibition
Source: eLife. 2021 Apr 15;10:e63076. doi: 10.7554/eLife.63076 (PMC8147088; doi:10.7554/eLife.63076)
Supplement: Figure 1—figure supplement 1—source data 11. [file elife-63076-fig1-figsupp1-data11.xlsx]

## Sheet: Figure 1-Figure Supplement 1O
Veh	NTG
520.955	766.104
362.043	522.888
511.897	549.548
390.422	388.421
213.185	418.23
327.344	265.628
399.61	567.016
375.313	330.632
537.119	599.921
477.549	316.182
645.774	340.774
437.145	293.471
652.112	483.905
428.498	176.134
604.465	349.403
398.044	335.561
247.617	577.512
242.349	323.399
507.119	430.177
497.652	236.953
295.345	478.325
436.853	282.219
389.557	431.208
154.736	392.308
335.005	242.49
298.778	323.938
455.014	509.448
888.987	153.921
351.759	311.044
312.161	242.517
240.881	404.33
463.283	593.983
319.209	347.985
375.137	430.1
245.476	256.434
531.94	519.103
