# Supplementary material for: Neuronal complexity is attenuated in preclinical models of migraine and restored by HDAC6 inhibition
Source: eLife. 2021 Apr 15;10:e63076. doi: 10.7554/eLife.63076 (PMC8147088; doi:10.7554/eLife.63076)
Supplement: Figure 1—figure supplement 1—source data 12. [file elife-63076-fig1-figsupp1-data12.xlsx]

## Sheet: Figure 1-Figure Supplement 1P
Veh	NTG
60	86
38	59
51	62
41	36
24	47
35	31
42	65
41	39
59	61
52	32
65	41
50	33
72	55
44	22
72	35
45	36
27	63
26	40
59	44
57	25
34	53
51	28
41	47
14	44
33	28
37	37
52	56
47	20
39	30
29	24
26	41
45	63
36	35
44	48
29	30
50	56
