# Supplementary material for: Neuronal complexity is attenuated in preclinical models of migraine and restored by HDAC6 inhibition
Source: eLife. 2021 Apr 15;10:e63076. doi: 10.7554/eLife.63076 (PMC8147088; doi:10.7554/eLife.63076)
Supplement: Figure 1—figure supplement 1—source data 13. [file elife-63076-fig1-figsupp1-data13.xlsx]

## Sheet: Figure 1-Figure Supplement 1R
Vehicle	NTG
11	10
6	7
10	6
9	11
9	7
12	11
8	10
7	8
6	9
11	10
10	10
13	7
9	8
8	10
10	11
10	10
7	11
11	10
11	9
15	10
8	9
11	11
10	7
7	13
9	11
8	8
9	7
10	10
12	8
12	14
11	11
7	8
14	8
10	13
12	12
11	12
