# Supplementary material for: Neuronal complexity is attenuated in preclinical models of migraine and restored by HDAC6 inhibition
Source: eLife. 2021 Apr 15;10:e63076. doi: 10.7554/eLife.63076 (PMC8147088; doi:10.7554/eLife.63076)
Supplement: Figure 1—figure supplement 1—source data 14. [file elife-63076-fig1-figsupp1-data14.xlsx]

## Sheet: Figure 1-Figure Supplement 1S
Vehicle	NTG
573.335	320.781
258.187	357.003
414.009	179.175
365.8	302.809
284.97	252.28
348.706	461.652
313.655	371.21
308.462	340.888
201.331	342.613
478.411	604.43
340.249	397.003
484.179	300.765
326.267	201.307
225.244	399.632
308.603	308.77
292.939	317.464
206.888	297.351
364.416	392.507
303.912	242.271
379.957	265.476
171.617	257.053
251.751	360.968
268.312	187.249
172.592	506.736
193.105	276.83
225.92	202.101
306.625	194.375
231.148	187.597
343.874	350.895
516.83	412.002
485.387	276.578
292.155	417.978
503.295	186.105
453.58	502.709
398.1	376.028
354.018	307.624
