# Supplementary material for: Neuronal complexity is attenuated in preclinical models of migraine and restored by HDAC6 inhibition
Source: eLife. 2021 Apr 15;10:e63076. doi: 10.7554/eLife.63076 (PMC8147088; doi:10.7554/eLife.63076)
Supplement: Figure 1—figure supplement 1—source data 15. [file elife-63076-fig1-figsupp1-data15.xlsx]

## Sheet: Figure 1-Supplement 1T
Vehicle	NTG
63	32
32	39
43	20
43	30
34	28
38	48
34	41
36	40
25	39
55	68
37	45
55	34
32	22
29	49
36	33
32	36
20	35
41	45
35	26
42	28
18	27
28	35
31	20
18	58
21	26
26	22
37	25
24	21
37	40
60	49
53	31
34	48
57	21
49	56
42	42
35	36
