# Supplementary material for: Neuronal complexity is attenuated in preclinical models of migraine and restored by HDAC6 inhibition
Source: eLife. 2021 Apr 15;10:e63076. doi: 10.7554/eLife.63076 (PMC8147088; doi:10.7554/eLife.63076)
Supplement: Figure 1—source data 1. [file elife-63076-fig1-data1.xlsx]

## Sheet: Figure 1B
Days	Veh								NTG
1	0.704	0.603	0.873	0.691	0.327	1.06	0.828	0.828	0.828	0.43	1.12	0.23	1.24	0.46	0.474	1.12
5	0.46	0.828	0.828	0.544	0.704	1.12	0.828	0.46	0	0.052	0.00607	0.00607	0.00607	0.033	0.057	0.033
9	0.937	0.704	0.704	0.522	0.646	0.873	0.603	0.603	0.00607	0.00607	0.077	0.00607	0.00607	0.00607	0.00607	0.00607
