# Supplementary material for: Neuronal complexity is attenuated in preclinical models of migraine and restored by HDAC6 inhibition
Source: eLife. 2021 Apr 15;10:e63076. doi: 10.7554/eLife.63076 (PMC8147088; doi:10.7554/eLife.63076)
Supplement: Figure 1—source data 2. [file elife-63076-fig1-data2.xlsx]

## Sheet: Figure 1E
Vehicle	NTG
10	6
7	9
10	5
11	4
7	5
6	4
6	3
5	5
10	7
9	10
7	6
7	6
7	5
9	5
12	5
8	4
8	3
4	4
11	7
5	11
7	9
10	6
9	6
9	6
11	5
7	6
7	6
7	5
5	5
8	5
10	8
6	11
6	5
9	5
6	5
5	5
