# Supplementary material for: Neuronal complexity is attenuated in preclinical models of migraine and restored by HDAC6 inhibition
Source: eLife. 2021 Apr 15;10:e63076. doi: 10.7554/eLife.63076 (PMC8147088; doi:10.7554/eLife.63076)
Supplement: Figure 1—source data 3. [file elife-63076-fig1-data3.xlsx]

## Sheet: Figure 1F
Vehicle	NTG
282.428	201.934
182.671	279.083
280.585	158.064
380.503	97.7262
401.707	216.598
204.005	135.932
185.068	150.407
193.414	280.926
293.037	352.361
238.524	377.755
185.938	220.233
190.721	213.043
188.238	184.433
201.935	148.889
308.529	168.825
336.021	170.069
189.313	78.8539
198.849	131.614
241.835	223.789
192.862	321.989
88.4658	352.441
276.287	214.837
191.122	122.852
171.227	188.851
417.879	185.941
409.014	286.861
352.462	171.07
343.018	239.114
177.77	236.881
309.539	180.594
457.881	223.899
279.205	375.737
345.878	136.416
245.107	234.241
234.458	105.945
278.347	130.075
