# Supplementary material for: Neuronal complexity is attenuated in preclinical models of migraine and restored by HDAC6 inhibition
Source: eLife. 2021 Apr 15;10:e63076. doi: 10.7554/eLife.63076 (PMC8147088; doi:10.7554/eLife.63076)
Supplement: Figure 1—source data 4. [file elife-63076-fig1-data4.xlsx]

## Sheet: Figure 1H
Distance	Vehicle																																										NTG
0	1	1	2	1	1	1	1	1	1	1	1	1	2	1	1	1	1	1	1	2	1	1	1	1	1	1	1	1	1	1	1	1	1	2	2	2							1	1	1	1	1	1	1
20	2	5	2	3	5	6	4	3	3	3	4	4	5	4	5	7	3	2	3	3	4	3	4	7	5	4	2	3	4	5	3	2	2	8	3	4							3	4	3	2	3	3	2
40	8	6	7	6	7	6	6	5	4	7	6	4	4	8	4	7	4	2	4	2	4	6	6	5	8	5	4	4	4	6	7	5	4	7	6	4							4	5	4	5	4	3	3
60	10	6	7	6	7	4	4	5	3	3	6	5	5	5	4	6	2	2	4	2	1	6	2	3	8	4	4	5	4	7	6	6	2	7	4	5							4	6	3	5	4	4	4
80	5	3	7	6	7	1	2	5	3	2	4	3	1	5	4	6	2	3	3	3		6	2	3	6	4	4	4	3	7	6	6	3	5	3	5							4	6	2	4	3	3	5
100	3	1	5	7	6	1	1	3	2	2	1	2	1	1	5	4	2	2	4	3		5	1		6	5	5	4	1	6	6	3	3	2	3	4							4	5	1	4	4	2	5
120	1		2	5	6	1	1		4	2	1	2	1		3	3	1	1	5	2		1	1		4	5	5	5	1	5	6	3	3		3	4							1	3	1	3	4	2	6
140	1		1	3	4	1	1		3	2					3	2	1	1	4	2		1	1		2	3	5	3	1		4	3	3		2	4							1	2	1	3	3	2	4
160				2	3	1			1	1					3	2	1	2	1	1		1	1		2	2	4	3	1		2	2	3		1									1	1	2		1	3
180				2	1	1			2	2					1		1	2					1		2	2	3	4	1		2	1	3											1	1			1	3
200				1					3	1								2							1	2	1	2			2		3																3
220				1					1	1								1							1	2	1	1			2		3																1
240																									1	2	1				2		2																1
260																										2					1		1
280																										2							1
300																										2
320																										1
[truncated: 29 more columns]
