# Supplementary material for: Neuronal complexity is attenuated in preclinical models of migraine and restored by HDAC6 inhibition
Source: eLife. 2021 Apr 15;10:e63076. doi: 10.7554/eLife.63076 (PMC8147088; doi:10.7554/eLife.63076)
Supplement: Figure 1—source data 5. [file elife-63076-fig1-data5.xlsx]

## Sheet: Figure 1I
Vehicle	NTG
31	22
22	34
33	18
43	29
47	26
23	22
20	41
22	39
30	46
27	27
23	25
21	20
19	26
24	32
33	37
38	21
18	14
21	22
29	23
20	18
10	20
30	20
20	9
19	16
47	26
48	43
40	16
39	30
21	13
37	15
50	31
32	13
37	18
31	24
27	16
32	19
