# Supplementary material for: Neuronal complexity is attenuated in preclinical models of migraine and restored by HDAC6 inhibition
Source: eLife. 2021 Apr 15;10:e63076. doi: 10.7554/eLife.63076 (PMC8147088; doi:10.7554/eLife.63076)
Supplement: Figure 2—figure supplement 1—source data 2. [file elife-63076-fig2-figsupp1-data2.xlsx]

## Sheet: Figure 2-Figure Supplement 1B
Vehicle-Vehicle									NTG-Vehicle									Vehicle-ACY									NTG-ACY
0.8	1.13548	1.64743	0.352359	0.66	0.0807533	0.668802	0.324123	0.8	0.94366	0.502209	1.87881	0.308639	0.194976	0.370479	0.278903	0.418506	1.2	1.1162	1.82353	1.54306	0.303343	1.57773	1.30392	1.7	1.06389	2.14896	2.5	2.89	1.8987	1.665	3.8	1.9898	2.76	1.76028	1.98976
