# Supplementary material for: Neuronal complexity is attenuated in preclinical models of migraine and restored by HDAC6 inhibition
Source: eLife. 2021 Apr 15;10:e63076. doi: 10.7554/eLife.63076 (PMC8147088; doi:10.7554/eLife.63076)
Supplement: Figure 2—figure supplement 1—source data 3. [file elife-63076-fig2-figsupp1-data3.xlsx]

## Sheet: Figure 2-Figure Supplement 1C
Vehicle-Vehicle								NTG-Vehicle								Vehicle-ACY								NTG-ACY
0.859412	1.041	0.591543	1.32	0.593197	0.647952	0.190434	0.0787533	0.609	0.8711	0.512391	0.374483	0.571833	0.482552	0.488549	0.455283	2.08	1.814	2.52609	3.01921	2.76979	5.36485	3.55034	2.1465	1.261	1.54	2.67638	5.85956	5.7	5.44144	1.44699	5.80441
