# Supplementary material for: Neuronal complexity is attenuated in preclinical models of migraine and restored by HDAC6 inhibition
Source: eLife. 2021 Apr 15;10:e63076. doi: 10.7554/eLife.63076 (PMC8147088; doi:10.7554/eLife.63076)
Supplement: Figure 2—figure supplement 1—source data 4. [file elife-63076-fig2-figsupp1-data4.xlsx]

## Sheet: Figure 2-Figure Supplement 1D
Veh-Veh	NTG-Veh	Veh-ACY	NTG-ACY
0.711896	0.559881	0.908384	1.04032
0.583842	0.60418	0.903443	0.756802
0.644068	0.84397	0.864167	0.925645
0.597399	0.659418	0.814204	0.796182
0.542788	0.387032	0.401054	0.446126
