# Supplementary material for: Neuronal complexity is attenuated in preclinical models of migraine and restored by HDAC6 inhibition
Source: eLife. 2021 Apr 15;10:e63076. doi: 10.7554/eLife.63076 (PMC8147088; doi:10.7554/eLife.63076)
Supplement: Figure 2—figure supplement 1—source data 5. [file elife-63076-fig2-figsupp1-data5.xlsx]

## Sheet: Figure 2-Sigure Supplement 1E
Sal-Veh	NTG-Veh	Sal-ACY	NTG-ACY
0.737641	0.785514	0.88223	0.839355
0.677387	0.777539	0.938004	1.02739
1.0075	1.04886	1.07758	1.14351
0.776406	0.858142	0.820975	0.864015
0.800365	0.839046	1.00794	0.916241
0.677501	0.71268	0.917203	0.932788
