# Supplementary material for: Neuronal complexity is attenuated in preclinical models of migraine and restored by HDAC6 inhibition
Source: eLife. 2021 Apr 15;10:e63076. doi: 10.7554/eLife.63076 (PMC8147088; doi:10.7554/eLife.63076)
Supplement: Figure 2—source data 1. [file elife-63076-fig2-data1.xlsx]

## Sheet: Figure 2B
Veh-Veh	NTG-Veh	Veh-ACY	NTG-ACY
8	10	10	11
6	7	9	7
7	9	11	10
5	6	10	6
8	7	11	8
10	9	14	7
8	6	14	12
8	5	10	11
11	5	11	10
8	4	15	11
8	7	13	14
9	6	13	13
11	6	11	15
8	7	11	11
9	6	11	14
5	6	9	11
7	7	14	16
8	8	11	9
8	8	14	13
9	7	9	14
8	5	11	14
11	6	11	9
9	6	6	9
8	7	8	13
10	6	11	12
8	5	9	9
10	4	10	7
8	7	10	9
9	6	7	9
7	5	10	8
7	6	10	12
9	6	15	10
5	5	12	9
8	6	13	15
5	5	13	13
9	5	13	15
11	6
22	4
13	7
13	6
12	4
11	5
11	10
12	7
15	9
11	7
6	10
10	11
	11
	10
	8
	6
	7
	5
