# Supplementary material for: Neuronal complexity is attenuated in preclinical models of migraine and restored by HDAC6 inhibition
Source: eLife. 2021 Apr 15;10:e63076. doi: 10.7554/eLife.63076 (PMC8147088; doi:10.7554/eLife.63076)
Supplement: Figure 2—source data 2. [file elife-63076-fig2-data2.xlsx]

## Sheet: Figure 2C
Veh-Veh	NTG-Veh	Veh-ACY	NTG-ACY
373.471	388.804	472.829	885.085
245.826	181.484	472.241	314.37
338.357	199.243	304.442	372.656
269.998	260.223	348.38	323.073
265.153	349.778	332.135	254.068
521.311	340.502	434.109	201.424
280.391	160.276	376.758	424.045
241.538	203.103	349.798	522.832
356.926	284.688	340.709	577.122
269.144	95.4861	724.235	800.49
301.812	351.288	573.787	472.71
239.348	206.481	545.912	469.6
368.103	218.741	408.25	539.817
383.559	191.645	446.763	477.792
318.856	217.894	473.362	432.73
158.156	183.422	395.481	429.66
287.525	273.575	343.938	1012.11
274.393	358.867	549.11	515.729
276.402	229.05	707.092	641.178
259.361	237.569	298.215	735.898
305.031	172.633	500.984	541.971
430.197	218.021	569.693	573.109
220.999	248.452	298.177	421.812
294.966	189.324	488.356	629.953
269.707	177.817	614.613	501.385
342.168	178.509	474.735	590.037
256.079	138.155	429.381	277.461
273.227	244.678	428.635	393.766
350.642	169.839	240.658	403.914
228.971	119.44	341.468	210.341
182.222	250.952	455.092	450.929
322.535	255.32	430.953	334.987
116.07	236.509	381.864	425.515
214.555	200.98	737.713	1094.59
152.684	108.47	734.488	675.746
268.951	209.09	506.039	665.63
308.291	136.541
524.856	157.308
574.99	243.096
503.812	172.71
520.605	148.859
490.343	208.838
330.725	239.629
294.478	440.581
435.701	258.94
532.538	248.43
178.093	277.51
399.713	250.616
	433.681
	290.745
	239.282
	148.368
	388.59
	220.94
