# Supplementary material for: Neuronal complexity is attenuated in preclinical models of migraine and restored by HDAC6 inhibition
Source: eLife. 2021 Apr 15;10:e63076. doi: 10.7554/eLife.63076 (PMC8147088; doi:10.7554/eLife.63076)
Supplement: Figure 2—source data 3. [file elife-63076-fig2-data3.xlsx]

## Sheet: Figure 2E
Distance	Veh-Veh
0	2	1	1	1	2	1	1	2	2	1	1	2	2	2	1	1	1	1	1	1	1	1	1	2	2	1	2	2	2	1	1	1	1	2	2	2	2	1	1	1	2	1	1	1	1	2	1	1
20	4	2	2	1	3	5	3	4	2	5	5	1	3	5	3	2	4	6	4	6	1	8	5	3	6	4	4	3	4	6	3	4	5	3	4	2	3	4	5	2	5	4	8	7	2	2	3	3
40	7	5	5	4	6	6	5	5	6	4	8	11	8	6	3	5	6	4	8	5	3	10	4	5	7	6	7	6	5	6	5	7	5	6	5	5	5	12	6	3	4	8	7	8	8	8	5	6
60	7	5	5	3	7	7	4	5	7	6	7	7	9	7	4	3	6	5	6	4	9	8	4	6	7	7	8	7	7	4	5	4	3	5	5	3	7	12	6	6	8	12	9	7	12	9	5	5
80	6	4	5	3	4	10	5	2	7	5	6	3	8	6	7	3	6	5	4	2	6	6	3	4	5	6	2	4	6	3	5	3		4	2	3	6	7	5	7	7	6	5	5	10	7	1	6
100	4	3	6	3	3	8	4	2	5	3	4	3	5	6	7	2	5	5	1	5	4	5	3	4	3	4	2	2	4	2	2	3		1	2	4	4	5	8	5	6	5	2	3	4	7	1	4
120	4	3	3	4	2	7	5	2	5	2	2	2	4	6	5	1	5	2	1	4	4	4	2	3	3	3		2	3	1	1	4				2	4	4	8	5	6	4	2	2	1	8	1	4
140	2	1	4	4	1	6	3	3	4	1		2	2	4	3	1	2	1	1	2	3	3	1	3		2		2	3	1		4				3	2	2	7	4	5	4	1		1	7	1	4
160	2	1	3	3		3	1	3	3	1			1	1	1			1	1	1	2	2		3		1		1	2	1		2				1		1	6	4	3	4			1	6	1	3
180	2	1	2	2		3		1					1	1	1				1	1		1		1		1		1	1			1							4	5	3	3			1	1	1	3
200	1	1	2	1		2		1						1	1									1		1			1										3	3	3	2			1	1		2
220	1		1	1																																			2	1	2	1				1
240																																							1	1		1
260																																							1	1
280																																							1	1
300																																								1
320
340
360
380
400
420
440
460
