# Supplementary material for: Neuronal complexity is attenuated in preclinical models of migraine and restored by HDAC6 inhibition
Source: eLife. 2021 Apr 15;10:e63076. doi: 10.7554/eLife.63076 (PMC8147088; doi:10.7554/eLife.63076)
Supplement: Figure 2—source data 4. [file elife-63076-fig2-data4.xlsx]

## Sheet: Figure 2F
Veh-Veh	NTG-Veh	Veh-ACY	NTG-ACY
42	40	55	86
27	20	54	35
39	22	35	36
30	29	40	34
28	39	31	26
58	39	42	24
31	19	35	45
30	24	36	58
41	33	37	67
28	13	73	92
33	40	55	54
31	24	60	49
43	27	41	56
45	21	47	50
36	24	46	46
18	20	42	48
35	29	35	114
30	37	55	59
28	29	67	70
31	27	33	80
33	19	57	60
48	26	53	66
23	28	32	47
35	21	57	70
33	19	70	50
36	21	57	63
25	17	50	31
30	29	45	41
38	21	29	45
25	14	35	23
22	25	48	50
33	31	43	35
14	25	44	47
21	27	78	116
20	13	79	81
25	21	50	62
33	16
48	18
64	29
50	18
54	17
55	21
35	26
33	49
42	30
59	20
20	33
41	26
	43
	33
	25
	18
	42
	25
