# Supplementary material for: Neuronal complexity is attenuated in preclinical models of migraine and restored by HDAC6 inhibition
Source: eLife. 2021 Apr 15;10:e63076. doi: 10.7554/eLife.63076 (PMC8147088; doi:10.7554/eLife.63076)
Supplement: Figure 3—source data 1. [file elife-63076-fig3-data1.xlsx]

## Sheet: Figure 3A
	VEH-VEH												VEH-ACY-50mg/kg												NTG-VEH												NTG-ACY 50 mg/kg
Baseline	0.603	0.46	0.327	0.46	0.603	0.43	0.46	0.873	0.421				0.43	1.12	0.23	0.351	0.43	0.704	0.46	0.704	0.327				0	0.033	0.033	0	0.00607	0.00607	0.00607	0	0.00607				0.052	0.00607	0.00607	0	0	0	0.00607	0	0
4 hr	0.691	0.46	0.594	0.43	0.43	0.351	0.544	0.522	0.646	1.07	0.46	0.828	0.46	0.691	0.46	0.46	0.327	0.43	0.594	0.828	0.46	0.522	0.43	0.421	0	0.033	0.00607	0.00607	0	0.00607	0.00607	0.00607	0.033	0.00607	0.033	0.052	0.543	0.937	0.46	0.38	0.327	0.46	0.968	0.522	0.522	0.828	0.38	0.23
24 hr	0.704	0.828	0.38	0.23	0.38	0.351	0.704	0.421	0.522				0.43	0.603	0.23	0.691	0.43	1.12	0.873	0.46	0.522				0.033	0.052	0.00607	0	0.00607	0.00607	0.033	0.00607	0.00607				0.603	0.23	0.351	0.43	0.544	0.828	0.421	0.603	0.327
48 hr	0.828	0.421	0.421	0.544	0.828	0.828	0.544	0.43	0.38				0.603	0.23	0.351	0.704	0.522	0.937	0.351	0.421	0.594				0.00607	0.16	0.00607	0.00607	0.43	0.033	0.00607	0.00607	0				0.096	0.033	0.211	0.102	0.00607	0.00607	0.163	0.102	0.00607
