# Supplementary material for: Neuronal complexity is attenuated in preclinical models of migraine and restored by HDAC6 inhibition
Source: eLife. 2021 Apr 15;10:e63076. doi: 10.7554/eLife.63076 (PMC8147088; doi:10.7554/eLife.63076)
Supplement: Figure 3—source data 2. [file elife-63076-fig3-data2.xlsx]

## Sheet: Figure 3C
Saline-Veh	NTG-Veh	Saline-ACY	NTG-ACY
14	7	9	11
10	11	11	12
11	13	15	17
11	8	11	11
16	10	10	8
10	13	10	12
11	11	11	11
10	11	11	14
13	11	14	12
7	8	14	16
9	11	12	12
11	9	12	13
19	9	12	19
19	12	15	9
20	9	21	9
20	10	14	9
14	10	10	10
13	8	14	12
17	9	13	11
17	11	12	16
11	10	11	14
19	9	15	10
15	9	16	7
11	12	11	11
11	10	10	11
11	8	11	7
11	8	10	11
13	8	9	7
10	8	13	11
8	11	13	12
8	6	18	8
9	9	14	15
16	10	17	14
12	11	12	14
10	10	8	12
12	9	11	12
