# Supplementary material for: Neuronal complexity is attenuated in preclinical models of migraine and restored by HDAC6 inhibition
Source: eLife. 2021 Apr 15;10:e63076. doi: 10.7554/eLife.63076 (PMC8147088; doi:10.7554/eLife.63076)
Supplement: Figure 3—source data 3. [file elife-63076-fig3-data3.xlsx]

## Sheet: Figure 3D
Saline-Veh	NTG-Veh	Saline-ACY	NTG-ACY
574.652	226.38	320.619	434.943
371.976	248.078	497.979	644.759
481.515	316.99	612.956	826.721
515.981	232.029	413.489	547.909
924.953	438.684	282.782	484.469
294.344	274.503	330.258	300.804
370.916	464.968	484.184	478.662
367.765	460.367	342.562	517.28
404.105	279.911	394.943	378.758
255.982	354.78	379.516	524.151
301.888	370.542	259.276	521.786
333.877	211.256	262.133	474.819
514.241	546.07	339.54	709.268
571.451	454.499	494.251	257.069
712.111	524.549	573.049	264.004
591.683	417.831	367.041	404.657
314.529	316.765	631.188	232.866
251.791	237.408	540.145	441.342
590.676	243.365	390.512	705.904
688.373	338.609	325.775	818.63
355.674	274.688	327.264	558.109
638.97	479.719	481.493	509.836
508.751	288.907	340.156	308.519
292.412	267.005	454.158	536.124
302.042	325.895	618.684	250.638
322.009	273.389	303.985	187.089
419.366	295.615	402.919	313.109
308.139	291.101	256.396	257.792
360.239	290.504	529.636	191.488
251.022	530.216	501.843	382.928
418.35	319.409	474.685	218.198
197.607	296.939	447.265	310.985
330.995	321.437	590.901	381.197
561.896	366.664	277.845	465.654
297.399	408.235	204.147	487.49
606.971	176.906	227.881	578.17
