# Supplementary material for: Neuronal complexity is attenuated in preclinical models of migraine and restored by HDAC6 inhibition
Source: eLife. 2021 Apr 15;10:e63076. doi: 10.7554/eLife.63076 (PMC8147088; doi:10.7554/eLife.63076)
Supplement: Figure 3—source data 4. [file elife-63076-fig3-data4.xlsx]

## Sheet: Figure 3E
Saline-Veh	NTG-Veh	Saline-ACY	NTG-ACY
64	24	35	45
38	23	53	68
51	31	64	84
51	28	43	61
100	46	30	57
34	27	34	28
40	52	46	59
35	47	36	56
40	25	42	35
28	36	40	55
36	36	24	56
35	21	26	52
57	63	37	70
51	52	50	27
77	53	55	28
54	48	39	42
33	35	74	23
27	28	57	40
63	29	39	73
63	33	35	89
37	28	32	56
64	31	47	57
55	32	34	35
29	38	50	58
34	36	68	27
34	29	30	20
48	33	43	31
31	34	29	26
38	33	63	19
29	57	57	44
47	32	48	24
19	33	47	30
37	37	59	41
61	41	25	45
34	47	23	53
66	20	23	63
