# Supplementary material for: Neuronal complexity is attenuated in preclinical models of migraine and restored by HDAC6 inhibition
Source: eLife. 2021 Apr 15;10:e63076. doi: 10.7554/eLife.63076 (PMC8147088; doi:10.7554/eLife.63076)
Supplement: Figure 3—source data 5. [file elife-63076-fig3-data5.xlsx]

## Sheet: Figure 3F
Saline-Veh	NTG-Veh	Saline-ACY	NTG-ACY
11	13	12	10
8	10	10	12
8	6	15	5
9	8	10	11
10	9	11	7
7	6	7	8
14	8	12	10
14	7	10	9
12	10	11	8
12	11	16	11
9	9	15	8
5	9	14	7
12	12	16	9
14	8	11	11
12	8	11	12
15	13	10	7
15	12	15	10
9	8	10	11
16	11	10	10
14	8	8	11
14	7	9	14
13	9	11	10
15	11	10	7
14	10	10	8
20	10	12	8
10	9	9	8
14	9	12	6
10	10	24	13
11	11	16	12
12	9	16	9
15	8	12	7
18	8	13	9
18	12	12	6
12	9	11	7
16	8	12	11
13	9	9	9
