# Supplementary material for: Neuronal complexity is attenuated in preclinical models of migraine and restored by HDAC6 inhibition
Source: eLife. 2021 Apr 15;10:e63076. doi: 10.7554/eLife.63076 (PMC8147088; doi:10.7554/eLife.63076)
Supplement: Figure 3—source data 6. [file elife-63076-fig3-data6.xlsx]

## Sheet: Figure 3G
Saline-Veh	NTG-Veh	Saline-ACY	NTG-ACY
366.197	302.645	360.235	266.044
395.501	146.038	428.328	385.953
179.083	179.957	423.551	237.476
243.694	260.366	426.046	291.05
362.472	261.367	343.286	209.776
213.542	198.216	251.566	185.238
405.401	248.503	299.779	443.347
373.713	196.611	411.232	297.883
281.013	282.375	283.871	362.035
323.042	357.147	298.212	367.761
308.474	279.937	282.541	224.899
199.546	244.433	429.176	272.836
555.527	304.743	512.67	280.479
357.034	254.53	291.631	209.222
452.201	180.254	265.103	332.664
462.161	457.333	260.804	176.868
227.493	456.288	362.689	238.433
214.206	213.083	373.935	180.072
624.801	437.335	284.956	288.438
311.672	202.008	203.933	289.761
315.597	284.664	321.81	437.456
354.374	346.726	448.663	577.813
517.303	449.32	205.803	263.065
440.832	220.93	235.517	398.223
588.954	292.95	411.382	256.665
226.085	187.491	306.635	201.43
309.592	235.29	364.018	177.166
441.399	321.219	730.673	362.158
232.066	401.804	653.399	469.318
292.608	198.45	398.145	264.855
428.469	346.223	652.812	302.439
436.231	200.697	705.728	270.255
444.432	480.974	376.694	238.409
357.472	286.16	271.124	231.806
471.455	339.362	261.854	335.842
324.415	239.764	201.357	289.551
