# Supplementary material for: Neuronal complexity is attenuated in preclinical models of migraine and restored by HDAC6 inhibition
Source: eLife. 2021 Apr 15;10:e63076. doi: 10.7554/eLife.63076 (PMC8147088; doi:10.7554/eLife.63076)
Supplement: Figure 3—source data 7. [file elife-63076-fig3-data7.xlsx]

## Sheet: Figure 3H
Saline-Veh	NTG-Veh	Saline-ACY	NTG-ACY
41	34	40	27
43	17	45	36
15	20	42	25
28	27	45	29
38	27	39	22
22	23	31	18
45	25	35	51
37	22	46	35
29	31	30	40
35	39	31	37
33	30	31	23
23	25	46	30
59	39	49	32
39	29	32	20
46	18	26	37
47	47	25	18
26	44	34	25
22	18	39	19
71	41	30	30
32	21	24	28
33	31	34	47
35	38	50	63
52	46	23	30
48	25	23	45
61	27	40	27
20	20	34	22
34	27	41	20
50	36	73	41
23	42	73	51
28	21	45	30
44	35	71	35
41	25	74	33
42	55	43	28
40	31	29	25
56	42	29	38
35	27	22	27
