# Supplementary material for: Neuronal complexity is attenuated in preclinical models of migraine and restored by HDAC6 inhibition
Source: eLife. 2021 Apr 15;10:e63076. doi: 10.7554/eLife.63076 (PMC8147088; doi:10.7554/eLife.63076)
Supplement: Figure 4—figure supplement 1—source data 1. [file elife-63076-fig4-figsupp1-data1.xlsx]

## Sheet: Figure 4-Figure Supplement 1C
Vehicle	NTG
0.616322	0.577607
1.2908	1.21845
0.743174	2.55926
0.815849	2.45893
1.8343	3.00946
1.66863	2.06716
2.10954	2.27366
1.09811	1.11966
0.548199	2.1489
0.533374	2.07654
