# Supplementary material for: Neuronal complexity is attenuated in preclinical models of migraine and restored by HDAC6 inhibition
Source: eLife. 2021 Apr 15;10:e63076. doi: 10.7554/eLife.63076 (PMC8147088; doi:10.7554/eLife.63076)
Supplement: Figure 4—source data 1. [file elife-63076-fig4-data1.xlsx]

## Sheet: Figure 4A
	Veh-Veh						Veh-TSA						NTG-VEH						NTG-TSA
Baseline	0.646	0.603	0.873	0.646	0.522	0.544	0.46	0.704	0.646	0.704	0.646	0.704	0.00607	0.033	0.000607	0.00607	0.00607	0.057	0.00607	0.052	0.00607	0.00607	0.00607	0.033
Post-Treatment	0.46	1.12	0.873	0.937	0.937	0.828	1.12	0.46	0.937	0.646	0.873	0.828	0.00607	0.00607	0.052	0.00607	0.00607	0.00607	0.46	0.828	0.603	0.46	0.318	0.327
