# Supplementary material for: Neuronal complexity is attenuated in preclinical models of migraine and restored by HDAC6 inhibition
Source: eLife. 2021 Apr 15;10:e63076. doi: 10.7554/eLife.63076 (PMC8147088; doi:10.7554/eLife.63076)
Supplement: Figure 4—source data 2. [file elife-63076-fig4-data2.xlsx]

## Sheet: Figure 4B
	Vehicle-Vehicle								Vehicle-1 mg/kg RN-73								Vehicle-10 mg/kg RN-73								NTG-Vehicle								NTG-1 mg/kg RN-73								NTG-10 mg/kg RN-73
Baseline	1.11	0.828	1.07	0.937	1.241	1.202	1.069	1.069	0.46	1.11	1.11	0.937	1.069	0.828	0.828	1.912	0.704	1.11	1.5	0.46	1.912	0.645	1.105	1.069	0.033	0	0.077	0.00607	0.052	0.052	0.052	0.006	0.033	0.052	0.033	0.00607	0.006	0.006	0.006	0.033	0.052	0.00607	0.00607	0.033	0.006	0.006	0.006	0.006
2 h	0.873	0.828	0.351	0.46	1.241	0.828	1.105	1.241	0.351	0.646	0.937	0.704	1.069	0.828	1.069	1.105	0.646	0.46	1.5	1.12	0.937	0.646	1.241	1.241	0.00607	0.00607	0.00607	0.00607	0.052	0.033	0.033	0.006	0.193	0.318	0.318	0.102	0.23	0.43	0.43	0.138	0.828	0.873	0.46	0.603	0.873	0.828	0.968	0.873
4 h	1.5	0.937	0.737	0.828	0.828	0.828	0.937	1.638	0.937	0.704	0.603	0.828	0.937	1.503	0.828	1.105	1.48	0.968	0.937	0.937	1.639	1.117	1.503	1.105	0	0.033	0.033	0.033	0.052	0.066	0.052	0.006	0.603	0.594	0.522	0.327	0.38	0.873	1.241	0.522	1.41	0.46	1.12	0.646	0.828	1.117	1.069	1.117
24 h	0.828	0.937	0.646	0.828	0.937	0.704	1.241	1.411	0.968	0.937	1.24	0.873	1.117	0.873	0.968	1.281	0.704	0.46	1.91	0.603	1.241	0.603	1.069	0.828	0.00607	0.00607	0.052	0	0.006	0.006	0.033	0.052	0.00607	0.097	0.00607	0.052	0.033	0.052	0.052	0.006	0.033	0.052	0.052	0.033	0.006	0.052	0.006	0.033
