# Supplementary material for: Neuronal complexity is attenuated in preclinical models of migraine and restored by HDAC6 inhibition
Source: eLife. 2021 Apr 15;10:e63076. doi: 10.7554/eLife.63076 (PMC8147088; doi:10.7554/eLife.63076)
Supplement: Figure 4—source data 3. [file elife-63076-fig4-data3.xlsx]

## Sheet: Figure 4C
	Veh/Veh						Veh/ASV 1 mg/kg						NTG/VEH						NTG/ASV 1 mg/kg
Baseline	0.704	0.38	0.828	0.873	0.46	0.327	0.544	0.318	0.594	0.937	0.43	0.828	0.00607	0.00607	0.00607	0.00607	0.00607	0.00607	0.066	0	0.00607	0.00607	0.00607	0.00607
2 HR	0.327	0.46	0.937	0.603	0.704	0.474	0.873	0.351	0.327	0.327	0.211	0.691	0.057	0.00607	0.052	0	0.077	0.00607	0.097	0.033	0.00607	0	0	0.00607
24 HR	0.691	0.873	0.74	0.46	0.937	0.318	1.12	0.603	0.327	1.12	0.594	0.937	0.00607	0.00607	0.033	0	0.00607	0.052	0.00607	0.00607	0	0	0.033	0.00607
