# Supplementary material for: Neuronal complexity is attenuated in preclinical models of migraine and restored by HDAC6 inhibition
Source: eLife. 2021 Apr 15;10:e63076. doi: 10.7554/eLife.63076 (PMC8147088; doi:10.7554/eLife.63076)
Supplement: Figure 4—source data 4. [file elife-63076-fig4-data4.xlsx]

## Sheet: Figure 4D
Days	Veh-Veh						ACY-Veh						Veh-NTG						ACY-NTG
1	0.828	1.503	0.937	0.23	0.828	1.117	0.873	0.23	0.211	1.411	0.873	1.911	1.117	1.241	1.069	0.46	0.828	0.704	1.117	0.704	0.43	0.522	0.551	1.911
5	0.603	0.43	0.43	0.828	0.474	0.737	0.273	0.351	0.327	0.421	0.968	0.828	0.00607	0.077	0.097	0.00607	0.033	0.057	0.46	1.069	0.873	0.138	0.249	0.968
9	0.43	1.04	0.421	0.16	0.544	0.873	0.327	0.828	0.23	0.97	0.828	0.828	0.052	0.052	0.00607	0.00607	0.00607	0.00607	0.351	1.9	0.873	0.43	0.033	0.937
