# Supplementary material for: Neuronal complexity is attenuated in preclinical models of migraine and restored by HDAC6 inhibition
Source: eLife. 2021 Apr 15;10:e63076. doi: 10.7554/eLife.63076 (PMC8147088; doi:10.7554/eLife.63076)
Supplement: Figure 5—source data 1. [file elife-63076-fig5-data1.xlsx]

## Sheet: Figure 5D
Vehicle	ACY-738
12	6
14	7
15	10
16	8
13	9
10	9
17	9
