# Supplementary material for: Neuronal complexity is attenuated in preclinical models of migraine and restored by HDAC6 inhibition
Source: eLife. 2021 Apr 15;10:e63076. doi: 10.7554/eLife.63076 (PMC8147088; doi:10.7554/eLife.63076)
Supplement: Figure 6—figure supplement 1—source data 1. [file elife-63076-fig6-figsupp1-data1.xlsx]

## Sheet: Figure 6-Figure Supplement 1A
Sham	CSD
23	20
25	10
8	12
11	14
37	16
35	12
19	10
22	11
17	13
13	20
29	15
35	14
21	22
27	12
16	15
27	25
21	16
23	18
28	30
28	21
15	13
26	25
16	13
5	22
20	13
11	9
17	15
31	12
8	11
18	9
18	8
17	9
15	17
12	10
7	7
10	15
