# Supplementary material for: Neuronal complexity is attenuated in preclinical models of migraine and restored by HDAC6 inhibition
Source: eLife. 2021 Apr 15;10:e63076. doi: 10.7554/eLife.63076 (PMC8147088; doi:10.7554/eLife.63076)
Supplement: Figure 6—figure supplement 1—source data 2. [file elife-63076-fig6-figsupp1-data2.xlsx]

## Sheet: Figure 6-Figure Supplement 1B
Sham	CSD
501.497	731.569
654.079	319.18
227.814	636.757
235.854	693.957
879.256	763.739
707.121	637.099
446.728	195.591
873.532	244.955
626.91	332.044
517.342	849.422
837.551	421.232
394.786	393.037
534.465	625.116
899.762	433.839
482.833	521.348
986.576	684.699
788.121	366.125
514.721	498.362
866.159	637.765
651.555	409.786
332.014	318.056
754.316	494.392
249.486	429.308
121.922	617.585
436.398	541.925
176.059	220.372
237.018	466.237
758.035	286.947
220.52	457.332
544.594	263.825
275.433	187.933
253.784	142.821
162.556	430.695
288.681	187.577
129.354	200.523
193.811	233.447
