# Supplementary material for: Neuronal complexity is attenuated in preclinical models of migraine and restored by HDAC6 inhibition
Source: eLife. 2021 Apr 15;10:e63076. doi: 10.7554/eLife.63076 (PMC8147088; doi:10.7554/eLife.63076)
Supplement: Figure 6—figure supplement 1—source data 3. [file elife-63076-fig6-figsupp1-data3.xlsx]

## Sheet: Figure 6-Figure Supplement 1C
Sham	CSD
27	79
25	34
17	68
29	76
13	83
22	71
55	60
71	44
25	52
26	68
82	34
63	50
56	18
82	24
51	31
100	87
86	45
56	38
41	59
82	42
66	32
54	49
89	49
39	65
78	56
66	24
35	54
72	36
28	49
15	29
42	22
21	15
18	46
75	24
25	25
58	24
