# Supplementary material for: Neuronal complexity is attenuated in preclinical models of migraine and restored by HDAC6 inhibition
Source: eLife. 2021 Apr 15;10:e63076. doi: 10.7554/eLife.63076 (PMC8147088; doi:10.7554/eLife.63076)
Supplement: Figure 6—source data 1. [file elife-63076-fig6-data1.xlsx]

## Sheet: Figure 6C
	Veh
Sham	14	10	11	16	11	13	15	10	18	18	12	12	24	16	20	17	18	17	15	15	19	16	17	13	23	19	15	22	21	15	16	14	18	16	19	9	24	27	17	33	13	15	23	19	26	19	32	20	21
CSD	11	9	11	10	9	7	9	7	10	8	10	17	13	10	16	14	11	13	18	10	9	12	12	13	8	14	14	14	12	13	16	15	14	12	12	17	26	20	22	18	25	22	18	24	20	19	22	19	20
[truncated: 65 more columns]
