# Supplementary material for: Neuronal complexity is attenuated in preclinical models of migraine and restored by HDAC6 inhibition
Source: eLife. 2021 Apr 15;10:e63076. doi: 10.7554/eLife.63076 (PMC8147088; doi:10.7554/eLife.63076)
Supplement: Figure 6—source data 2. [file elife-63076-fig6-data2.xlsx]

## Sheet: Figure 6D
	Vehicle
Sham	404.118	240.856	448.099	636.779	373.731	538.353	510.513	262.372	524.88	508.5	328.139	288.214	714.262	421.543	538.339	482.374	567.539	616.729	488.573	655.734	618.388	592.402	491.419	331.879	706.485	557.169	510.967	881.077	650.33	413.189	740.247	524.083	776.614	813.412	730.609	252.614	690.096	816.931	769.212	1124.55	476.527	483.216	754.522	611.362	1033.41	519.149	860.77	582.732	871.173
CSD	409.849	421.833	339.971	307.656	251.353	224.296	301.016	190.053	338.932	274.656	176.157	441.151	454.426	319.926	516.123	520.693	372.019	424.139	587.007	380.473	190.076	587.445	505.562	304.275	304.933	493.407	364.88	439.178	438.234	411.456	498.947	500.366	532.898	495.741	323.484	540.787	939.031	655.885	726.001	634.328	873.759	670.686	665.528	647.643	610.401	573.978	585.605	511.98	547.281
[truncated: 65 more columns]
