# Supplementary material for: Neuronal complexity is attenuated in preclinical models of migraine and restored by HDAC6 inhibition
Source: eLife. 2021 Apr 15;10:e63076. doi: 10.7554/eLife.63076 (PMC8147088; doi:10.7554/eLife.63076)
Supplement: Figure 6—source data 3. [file elife-63076-fig6-data3.xlsx]

## Sheet: Figure 6F
	Sham-Veh																																										CSD-Veh
0	1	2	2	2	1	1	1	1	1	1	1	1	2	2	1	2	1	1	1	1	1	1	1	2	1	1	1	1	1	1	1	1	2	1	1	2	1	1	1	2	1	1	2	2	2	1	1	1	1
20	8	6	7	1	9	6	6	4	3	7	6	8	6	5	5	6	6	6	3	4	4	7	3	4	4	7	6	6	5	5	10	7	2	5	6	4	9	10	6	10	5	5	4	6	6	7	5	7	6
40	12	7	9	9	9	7	6	7	10	5	9	12	10	11	11	9	13	10	11	8	7	9	12	10	10	8	5	10	11	11	9	6	7	7	6	8	15	14	11	14	12	10	7	6	10	8	7	6	7
60	8	4	8	11	8	6	5	4	9	5	6	3	8	6	11	6	11	11	9	7	10	10	11	7	12	6	5	11	6	6	7	7	9	11	6	5	9	24	14	11	10	12	5	8	6	7	5	5	7
80	5	1	8	7	4	5	3	3	5	6	6	1	9	3	8	4	10	11	7	9	11	10	10	5	10	5	7	18	6	6	8	6	12	11	8	3	10	12	13	14	7	9	4	5	5	6	2	4	5
100	3	2	5	7	3	8	6	2	5	7	2	2	5	5	7	9	6	11	8	5	6	6	9	3	10	2	2	14	2	2	8	6	12	9	7	2	3	9	11	15	6	6	3	3	1	2	1	3	3
120	2	2	2	7	3	6	2	2	3	4	2	2	5	7	4	3	3	9	5	7	8	3	4	3	7	1	2	9	2	2	7	4	10	9	6	2	2	5	9	12	5	4	1	2	1	1	1	1	1
140	1	1	1	7	2	5	2	2	3	5	1	1	3	3	3	3	2	5	4	6	6	3	2	2	4	1	3	8	2	2	7	4	7	7	4	1	3	4	8	9	5	1	1	2	1	1	1		1
160	1	1	1	6	2	1	1	2	5	6	1	1	3	2	1	2	1	2	2	5	3	2	1	1	3	2	2	4	1	1	8	3	7	6	3	1	4	3	4	8	2	1	3	2	1	1	1		1
180	1	1	1	2	1	2	2	1	1	3	1	1	3	1		2	1	2	2	3	2	2			1	1	1	3	1	1	8	1	6	6	2	1	2	2	2	5		1	2	1	1	1	1		1
200	3	1	1	1		2	1	1	1	1	1	1	2			1			1	3	1	2			2	3	3	1	1	1	6	1	2	6	2	1	1		2	7			1	1	1	1	1		1
220		1	1	1		2	2		1	1			1			1				4		1			2	1	3		1	1	3	2	2	4	2		1		2	3			1	1	1		1
240		1	1	1		1	1		1	1			1			1				2		1			2	1	5		1	1	2	2	1	2	4				1	2			1	1	1		2
260			1			1	1			1						1				1		1			2	3	1		1	1	1		1	1	4								1	1	1
280			1			1	1			1												1			1	3	1								3								1	1
300			1			1	1			1												1				2	1								1								1	1
320			1			1																1				1	1																1
340			2			1																1				1	1																2
360																						1					1																2
380																											1																1
400
420
440
460
480
500
520
540
560
580
[truncated: 107 more columns]
