# Supplementary material for: Neuronal complexity is attenuated in preclinical models of migraine and restored by HDAC6 inhibition
Source: eLife. 2021 Apr 15;10:e63076. doi: 10.7554/eLife.63076 (PMC8147088; doi:10.7554/eLife.63076)
Supplement: Figure 6—source data 4. [file elife-63076-fig6-data4.xlsx]

## Sheet: Figure 6G
	Vehicle
Sham	45	30	53	62	42	57	41	29	48	55	36	33	58	45	51	50	54	68	53	65	59	63	53	37	71	49	52	85	41	41	85	50	80	85	65	30	60	84	84	112	53	49	84	64	99	53	81	64	97
CSD	44	43	38	36	29	27	34	23	39	32	19	46	50	35	58	48	36	41	63	41	20	61	54	27	36	57	35	52	42	43	49	45	56	50	34	51	94	68	83	69	96	64	68	72	65	53	61	41	63
[truncated: 65 more columns]
