# Supplementary material for: Neuronal complexity is attenuated in preclinical models of migraine and restored by HDAC6 inhibition
Source: eLife. 2021 Apr 15;10:e63076. doi: 10.7554/eLife.63076 (PMC8147088; doi:10.7554/eLife.63076)
Supplement: Figure 7—source data 1. [file elife-63076-fig7-data1.xlsx]

## Sheet: Figure 7A
Days	Vehicle												NTG
1	0.544	1.117	0.23	0.43	0.318	0.318	0.603	1.639	0.873	0.937	0.327	0.318	0.603	0.46	0.43	0.594	0.873	0.937	0.873	0.522	0.097	1.241	0.737	0.43
5	0.351	0.327	0.43	0.46	0.421	0.38	0.937	1.639	0.46	0.282	0.937	0.46	0.052	0.00607	0.00607	0.00607	0.033	0.00607	0	0.00607	0.00607	0.138	0.033	0.057
9	0.704	0.23	0.522	1.117	0.351	0.937	0.737	1.241	0.937	0.46	0.351	0.544	0.00607	0.033	0.00607	0.033	0.00607	0.033	0.00607	0.00607	0.006074	0.00607	0.00607	0.00607
