# Supplementary material for: Neuronal complexity is attenuated in preclinical models of migraine and restored by HDAC6 inhibition
Source: eLife. 2021 Apr 15;10:e63076. doi: 10.7554/eLife.63076 (PMC8147088; doi:10.7554/eLife.63076)
Supplement: Figure 7—source data 2. [file elife-63076-fig7-data2.xlsx]

## Sheet: Figure 7B
	Veh-Veh						Veh-Olcegepant						NTG-Veh						NTG-Olcegepant
Baseline	0.43	0.704	1.117	1.241	0.138	0.43	0.603	0.46	0.43	1.241	0.46	0.828	0.00607	0.033	0.00607	0.077	0.00607	0.23	0.033	0.00607	0.033	0.033	0.033	0.00607
4 hr Post	0.327	0.46	0.777	0.844	0.704	0.937	0.828	0.937	0.351	0.873	0.646	1.117	0.066	0.00607	0.052	0.033	0.00607	0.066	0.46	0.937	1.241	0.74	0.828	0.544
