# Supplementary material for: Neuronal complexity is attenuated in preclinical models of migraine and restored by HDAC6 inhibition
Source: eLife. 2021 Apr 15;10:e63076. doi: 10.7554/eLife.63076 (PMC8147088; doi:10.7554/eLife.63076)
Supplement: Figure 7—source data 3. [file elife-63076-fig7-data3.xlsx]

## Sheet: Figure 7D
Veh-Veh	NTG-Veh	Veh-Olc	NTG-Olc
16	13	16	9
12	11	11	10
9	7	20	9
8	6	12	7
28	9	16	15
15	8	11	8
15	8	12	9
12	9	11	13
12	8	12	9
8	11	12	11
9	7	14	10
9	9	15	7
11	9	15	15
13	11	11	11
11	10	9	13
12	9	15	16
13	6	12	10
22	8	13	11
11	12	11	9
11	8	12	11
13	10	12	13
16	9	9	9
11	8	12	10
9	4	13	10
15	8	16	15
11	8	10	12
11	9	8	13
9	13	11	11
8	8	11	13
11	10	11	10
11	9	8	14
9	10	13	10
13	10	12	7
14	9	12	9
11	8	13	10
9	6	11	11
