# Supplementary material for: Neuronal complexity is attenuated in preclinical models of migraine and restored by HDAC6 inhibition
Source: eLife. 2021 Apr 15;10:e63076. doi: 10.7554/eLife.63076 (PMC8147088; doi:10.7554/eLife.63076)
Supplement: Figure 7—source data 4. [file elife-63076-fig7-data4.xlsx]

## Sheet: Figure 7E
Veh-Veh	NTG-Veh	Veh-Olc	NTG-Olc
409.356	441.577	424.687	218.111
409.24	458.416	321.88	336.616
253.962	238.194	698.817	301.752
216	177.011	405.516	425.779
670.769	258.472	493.229	563.192
377.055	299.925	480.496	248.195
798.85	220.921	401.852	278.782
335.837	220.563	325.542	414.617
336.908	263.508	285.05	392.516
386.036	459.273	340.449	558.461
338.621	240.748	375.332	310.317
242.86	348.058	519.513	194.561
387.858	225.103	383.625	465.525
348.426	246.325	253.703	233.255
456.177	357.608	309.82	344.259
360.904	267.831	285.926	540.355
308.829	182.873	285.888	265.247
552.035	278.807	368.664	372.409
350.183	349.365	253.69	437.064
216.711	181.581	284.925	342.772
295.238	253.793	362.362	331.402
583.081	277.29	235.804	525.579
321.168	344.702	248.441	406.799
262.381	133.612	206.985	356.688
294.64	240.78	461.055	531.042
366.106	254.788	378.862	294.926
411.252	377.913	317.091	500.23
249.48	253.787	570.341	311.882
191.114	188.067	445.403	397.634
303.796	297.498	480.828	257.213
373.522	289.837	379.555	438.675
306.389	187.852	381.692	424.461
513.557	193.833	363.488	224.633
399.184	341.773	309.091	315.228
480.233	269.252	299.295	414.157
327.088	207.606	255.195	380.032
