# Supplementary material for: Neuronal complexity is attenuated in preclinical models of migraine and restored by HDAC6 inhibition
Source: eLife. 2021 Apr 15;10:e63076. doi: 10.7554/eLife.63076 (PMC8147088; doi:10.7554/eLife.63076)
Supplement: Figure 7—source data 5. [file elife-63076-fig7-data5.xlsx]

## Sheet: Figure 7G
	Veh-Veh																																				NTG-Veh
0	1	1	1	1	1	1	1	1	1	1	1	1	1	1	1	1	1	1	2	1	1	1	1	1	1	1	1	1	1	1	2	1	1	1	1	1	1	1	1	1	1	1	1	1	1	1	1	1	1
20	3	9	5	2	8	6	4	2	4	4	5	2	3	8	4	4	4	4	6	8	10	5	3	3	4	6	6	2	5	4	3	7	6	5	3	2	4	4	5	3	6	5	5	6	2	6	3	6	3
40	8	10	9	4	8	9	10	7	10	7	6	5	6	7	6	7	8	7	9	9	8	10	8	8	6	10	7	7	4	8	6	7	8	10	7	3	8	5	4	5	6	6	5	7	3	8	7	9	6
60	7	7	5	5	7	8	8	6	9	7	6	5	10	5	7	10	10	9	7	4	8	13	8	9	11	11	7	5	5	5	4	7	6	10	10	4	6	6	4	4	6	8	5	7	3	8	6	7	6
80	5	4	2	4	8	7	9	2	4	7	4	5	6	6	8	6	7	9	7	3	4	13	5	4	6	8	6	4	3	5	8	5	6	7	8	6	4	4	4	3	4	7	4	3	4	8	5	5	3
100	5	4	1	2	7	3	7	1	3	7	4	3	7	5	6	5	1	11	4		1	12	4	1	2	3	4	1		3	6	2	7	7	4	6	4	3	3	1	2	3	3	1	3	7	3	5	3
120	6	2		1	7	1	6	3	2	3	4	1	4	2	6	5	1	9	2			5	2			1	4	1		2	6	2	6	2	3	5	4	3	2	1	2	1	1		3	5	1	3	1
140	6	1		1	9	1	5	4	1	2	5		2	1	3	1		8	1			2	1			1	3	1		1	2	2	6	1	1	4	5	3	1	1		1	1		3	4	1	1
160	1	1			9		5	3	1	2	2		2		1			2	1				1			1	2	1			2		4	1	1	4	5	4	1	1					2	4	1	1
180		1			2		6	3		1	2		1		1												2	1			1		3		1		2	4	1						1	1		1
200		1					6	2		1					1													1			1		2		1			3							1	1
220		1					6	2		1																		1			1				1			4							1
240							6	1		1																									2			1
260							5																												2			1
280							1																												2			1
300																																			1
320																																			1
340																																			1
360
380
400
[truncated: 95 more columns]
