# Supplementary material for: Neuronal complexity is attenuated in preclinical models of migraine and restored by HDAC6 inhibition
Source: eLife. 2021 Apr 15;10:e63076. doi: 10.7554/eLife.63076 (PMC8147088; doi:10.7554/eLife.63076)
Supplement: Figure 7—source data 6. [file elife-63076-fig7-data6.xlsx]

## Sheet: Figure 7H
Veh-Veh	NTG-Veh	Veh-Olc	NTG-Olc
42	43	44	25
42	47	33	36
23	26	76	33
20	20	41	49
66	27	49	56
36	32	51	27
85	25	48	32
37	25	35	45
35	27	32	44
44	53	34	63
39	28	39	32
22	39	54	21
42	23	42	47
35	27	27	27
44	41	33	36
39	30	30	56
32	21	29	26
60	34	41	41
39	36	28	47
25	21	30	36
32	26	38	36
61	28	26	53
33	38	26	41
26	14	21	40
30	24	51	57
42	34	38	29
42	47	34	53
26	25	65	30
18	21	54	39
29	34	54	30
42	31	41	44
33	23	35	45
55	20	37	21
44	35	34	35
50	28	33	46
35	23	25	40
